# Supplementary material for: Mg rechargeable batteries: an on-going challenge
Source: Royal Society of Chemistry journal article supplement (doi:10.1039/c3ee40871j), 2013-01-01
Supplement: c3ee40871j.pdf [file c3ee40871j.pdf]

## Electronic Supplementary Information

### Mg rechargeable batteries: an on-going challenge

Hyun Deog Yoo,<sup>a</sup> Ivgeni Shterenberg,<sup>a</sup> Yosef Gofer,<sup>a</sup> Gregory Gershinsky,<sup>a</sup> Nir Pour,<sup>a</sup>  
and Doron Aurbach<sup>\*a</sup>

<sup>a</sup> Department of Chemistry and Bar-Ilan Institute of Nanotechnology and Advanced Materials, Bar-Ilan  
University, Ramat-Gan, Israel 52900  
E-mail: Doron.Aurbach@biu.ac.il

In general, Al species constitute the anions in the organo-haloaluninate electrolytes. But very small ( $\sim 1/1000$  compared to Mg deposition) cathodic peak was observed before the beginning of Mg deposition (in the insets of Figs. S1 and S2 for DCC and APC electrolytes, respectively). And the potential range (0.2–0.7 V vs.  $\text{Mg}/\text{Mg}^{2+}$ ) is similar to the redox potential of  $\text{Al}^{3+}/\text{Al}$  (0.72 V vs.  $\text{Mg}/\text{Mg}^{2+}$ ). The reason why Al deposition is not dominant in these solutions would be the high Lewis basicity of the surrounding electrolyte, for Al deposition is favored in the Lewis acidic media.<sup>S1</sup> Simpler systems ( $\text{AlCl}_3$  in THF with or without the addition of  $\text{MgCl}_2$ ) shows clearer features of reversible Al deposition/dissolution (Figs. S3 and S4).

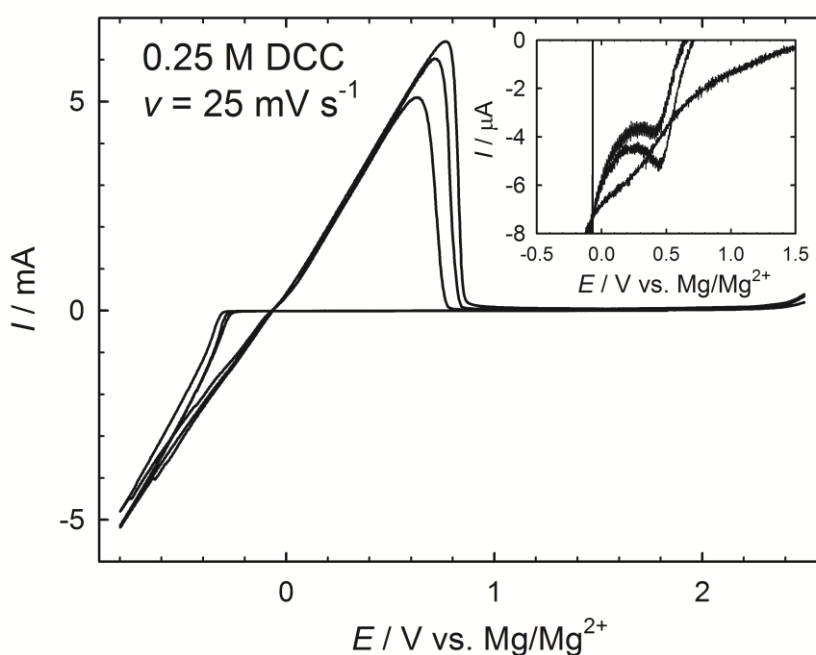

Figure S1 The cyclic voltammogram of 0.25 M DCC electrolyte on Pt substrate (scan rate =  $25 \text{ mV s}^{-1}$ ). The magnified view is in the inset.

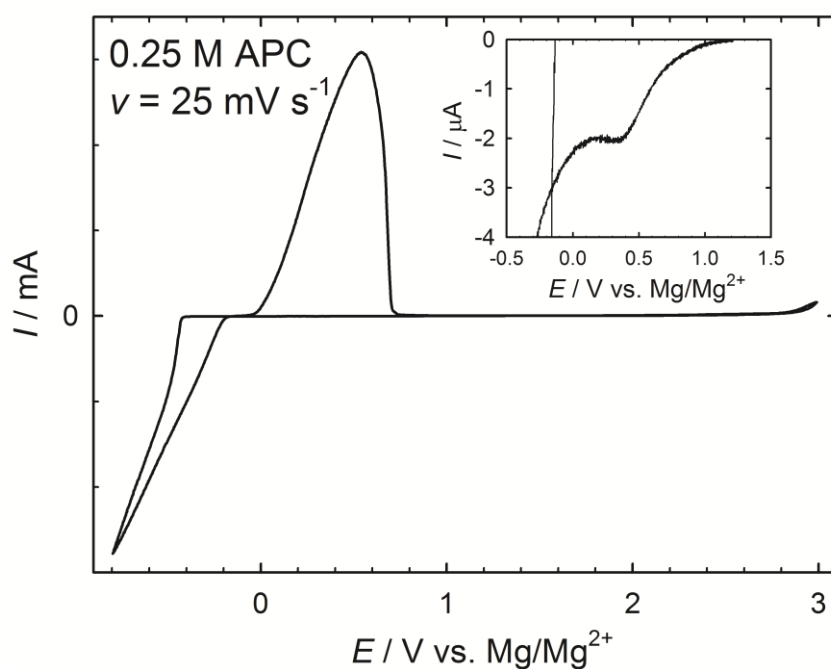

Figure S2 The cyclic voltammogram of 0.25 M APC electrolyte on Pt substrate (scan rate =  $25 \text{ mV s}^{-1}$ ). The magnified view is in the inset.

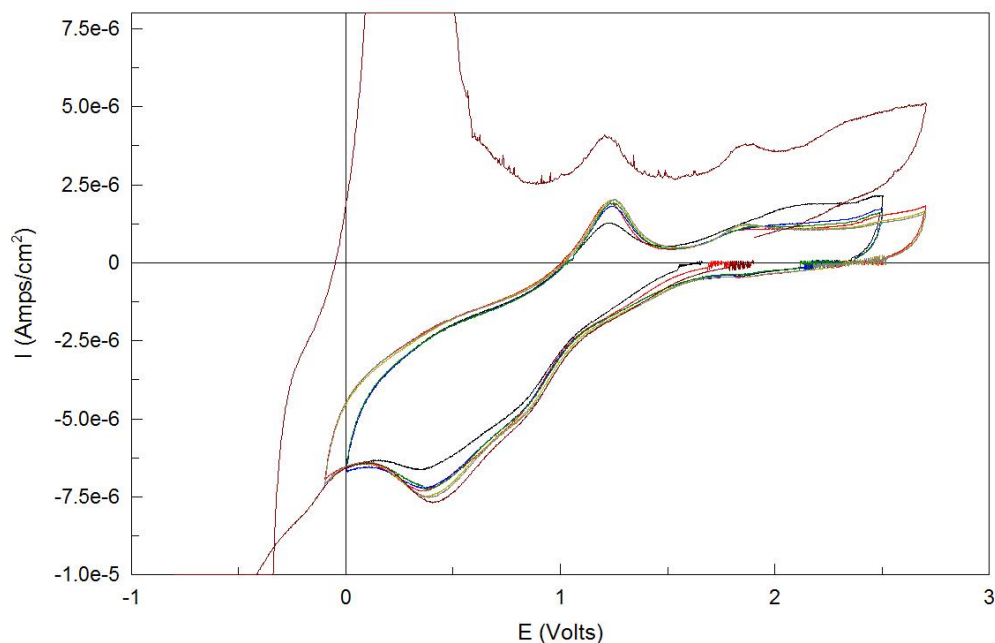

Figure S3 The cyclic voltammogram of 0.157 M AlCl<sub>3</sub> + 0.33 M MgCl<sub>2</sub> in THF on Pt substrate (scan rate =  $25 \text{ mV s}^{-1}$ ). The potential was measured with respect to 0 V vs. Mg/Mg<sup>2+</sup>. Al deposition and dissolution is clearly observed at 0.5 V and 1.2 V, respectively.

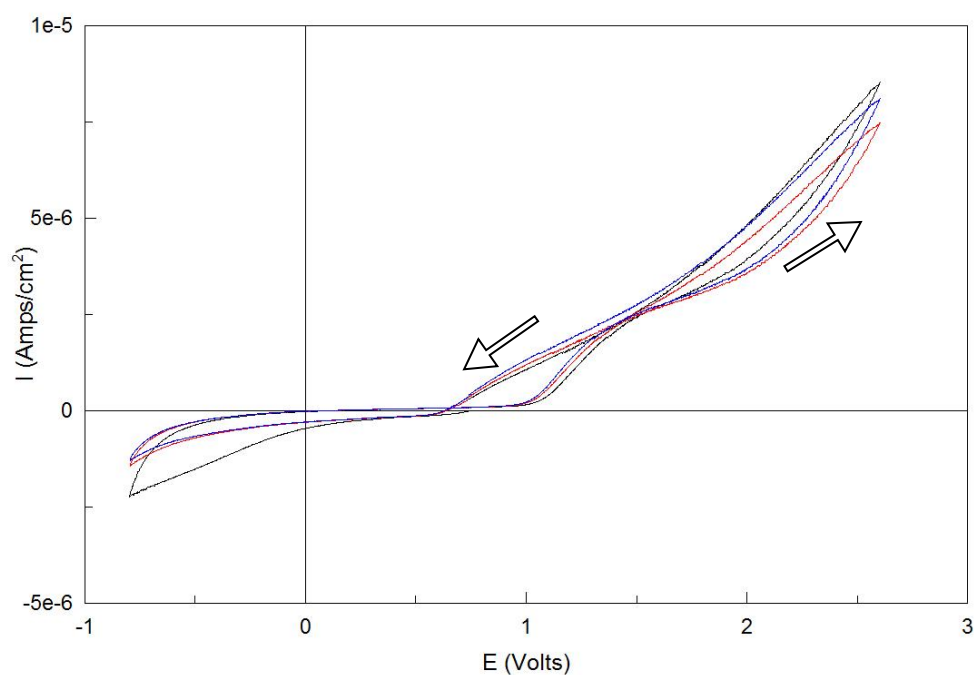

Figure S4 The cyclic voltammogram of 0.25 M  $\text{AlCl}_3$  in THF on Al substrate (scan rate =  $25 \text{ mV s}^{-1}$ ). The potential was measured with respect to Mg reference electrode. Al deposition and dissolution is observed at 0.6 V and 1.0 V, respectively.

#### Reference

- S1 D. Aurbach, in *Nonaqueous Electrochemistry*, ed. D. Aurbach, Marcel Dekker, New York, 1999, ch. 6, pp. 289-409.
